# Supplementary material for: RASSF1A uncouples Wnt from Hippo signalling and promotes YAP mediated differentiation via p73
Source: Nat Commun. 2018 Jan 30;9:424. doi: 10.1038/s41467-017-02786-5 (PMC5789973; doi:10.1038/s41467-017-02786-5)
Supplement: Supplementary file 6 — Supplementary Data 3 [file 41467_2017_2786_MOESM6_ESM.xlsx]

## Sheet: Yap proteomics ESC
Supplementary Data 3. YAP proteomics in mESC
	Identification per experiment						zsCtrl/zsRASSF1A Intensity Ratio
Gene names	exp1	exp2	exp3	Crapome		Protein name	exp1	exp2	exp3	Average Ratio
Ajuba				1 / 411		AJUBA	100	1.79427	1.40955e+06	469884
Amot				19 / 411		AMOT	0.811266			0.811266
Amotl1				4 / 411		AMOTL1	1			1
Amotl2						AMOTL2	1.22369			1.22369
Arid1a				24 / 411		ARID1A	0.729038	1.59292	0.851408	1.05779
Arid1b				12 / 411		ARID1B	0.751148	2.04466	0.488319	1.09471
Arid2						ARID5B	1.01162	2.04617	0.419335	1.15904
Arid5b				2 / 411		ARNT	0.1			0.1
Arnt				9 / 411		ATRX	1.35551	0.427431	0.709587	0.830842
Atrx				26 / 411		AURKA	1.12953	0.814201	1.2842	1.07598
Aurka				16 / 411		AURKB;aurkb-sv2;AURKC	1.39675	0.783053	1.12334	1.10105
Aurkb				29 / 411		AXIN1	1.33585	8.4191	2.74697e-08	3.25165
Aurkc				5 / 411		BIRC6	1			1
Aven				1 / 411		BMP2K	0.926467			0.926467
Axin1				1 / 411		BRD4	0.707912	0.956743	0.967933	0.877529
Baz1b				46 / 411		BRD9	0.93344	1.63546	0.710554	1.09315
Blm				21 / 411		BTAF1	1.27073			1.27073
Birc6				12 / 411		BTF3	0.0904426	0.595608	1.90659	0.864215
Bmp2k						BUB3	1.06711	1.00617	1.11135	1.06154
Brd2				19 / 411		CALM2;CALM1	0.79026	0.715763	1.60261	1.03621
Brd3				26 / 411		CARM1	0.888973	1.13117	1.15436	1.05817
Brd4				29 / 411		CBLL1	1.03673	1.21901	0.541424	0.932389
Brd7				17 / 411		CBX1	1.41408	0.601337	0.552505	0.855973
Brd9				11 / 411		CBX3	1.00977	0.996812	0.795646	0.934074
Btaf1				10 / 411		CCNK	0.979516			0.979516
Btf3				35 / 411		CCNL1	1.42503			1.42503
Bub3				112 / 411		CCNT1;CYCT1b	0.832422	1.69492	0.951301	1.15955
Calm1;Calml3						CCNT2	0.939077	1.09782	0.953456	0.996784
Carm1				24 / 411		CCT2	0.838211	0.443777	0.964779	0.748923
Cbll1				8 / 411		CDK11B;CDK11A;CDC2L2	1.1687	1.02623	1.043	1.07931
Cbx1				59 / 411		CDK12	1.43537			1.43537
Cbx3				85 / 411		CDKN2AIP	0.525491	32183850	9.18274e-08	1.0728e+07
Ccnk				27 / 411		CDKN2AIPNL	0.474243	6873150	2.35143	2.29105e+06
Ccnl1				4 / 411		CHD1	1.14906	1.28695	0.566809	1.00094
Ccnt1				36 / 411		CHD2	2.92289	1.31953	1.11324	1.78522
Ccnt2				8 / 411		CHD4	0.978244	0.715535	1.02301	0.905595
Cct2				180 / 411		CHD7	0.579903			0.579903
Cdc42				80 / 411		CHD8	1.59883	1.26017	0.859162	1.23939
Cdk1				81 / 411		CHEK1	0.90133	0.985397	1.25051	1.04575
Cdk11b				39 / 411		CHMP4B		0.209109	0.724744	0.466926
Cdk12				41 / 411		CIT	0.721618			0.721618
Cdk2;Cdk3						CTNNA1	1.2088	0.395609	1	0.868137
Cdk9				47 / 411		CTNNA2	0.940401	0.573785	4.88068e+06	1.62689e+06
Cdkn2aip				38 / 411		CTNNB1	1.15515			1.15515
Cdkn2aipnl				1 / 411		CTNNBL1	0.807693	1.25125	0.488283	0.849077
Chd1				32 / 411		CTNND1	0.858096	1.4046	0.755062	1.00592
Chd2				27 / 411		DOCK6	0.827196			0.827196
Chd4				80 / 411		DOCK7	0.948823	3.35149e-08	1	0.649608
Chd7				26 / 411		DVL2	1.16006			1.16006
Chd8				30 / 411		DYRK1A	1.16773	0.998295	0.743363	0.969795
Chek1				4 / 411		EP300	1.83688	0.677107	1.03029	1.18143
Chmp4b				28 / 411		ESRRB	0.644466	0.541238	2.87303	1.35291
Cit				9 / 411		ETV3	1			1
Cir1				26 / 411		ETV6	1.85639			1.85639
Ctnna1				34 / 411		EZR;RDX	0.534872	0.358332	1.21413	0.702444
Ctnna2				13 / 411		FAF2	1.16238			1.16238
Ctnnb1				30 / 411		FOXJ3	0.381315			0.381315
Ctnnbl1				19 / 411		GADD45GIP1	0.99507	0.897286	1.21804	1.0368
Ctnnd1				32 / 411		GATAD2B		0.320767	1.11061	0.715687
Dock6				7 / 411		GLI2	0.899583			0.899583
Dock7				30 / 411		GLI3	1			1
Dvl2				22 / 411		GNAI2	1.15337	0.440072	1.45502	1.01616
Drg1				53 / 411		GNB1	100			100
Dyrk1a						GNB2;GNB4		1	2.89477e-07	0.5
Ep300				2 / 411		GNB2L1	1.00562	0.868918	1.00309	0.959211
Esrrb				2 / 411		GPATCH8	0.71959	1.058	0.804464	0.860685
Etv3						GRB2	1.00903	0.838462	1.38451	1.07733
Etv6				1 / 411		GRB7	0.206301			0.206301
Ezrin						HAT1	0.911737	0.700574	0.52261	0.71164
Faf2				25 / 411		HCA90;TPX2	0.685389			0.685389
Foxj3						HTRA2	1.25058	0.888161	1.29109	1.14328
Gadd45gip1				22 / 411		HUWE1	1.22968			1.22968
GataD2b				50 / 411		ID1	1			1
Gata6				3 / 411		IQGAP1	1.01967	0.78188	0.994672	0.932074
Gatad2a				51 / 411		ITCH	1.39483			1.39483
Gli2						JAK1	1			1
Gli3						JARID2	1.48248	0.670585	1.13797	1.09701
Gnai2;Gnas;Gnai1;Gnat2;Gnat3;Gnai3;Gnat1						JMJD1C	0.823001	2.08681	0.616511	1.17544
Gnb1				59 / 411		JMJD6	1.14875	0.713932	2.28184	1.38151
Gnb2;Gnb4;Gnb1						JUP		0.0900241	0.655946	0.372985
Gnb2l1				135 / 411		KAT7	1.2644	0.680684	1.06934	1.00481
Gpatch1				45 / 411		KDM1A	1.04753	0.537602	1.29438	0.959838
Gpatch4				37 / 411		KDM2B	100	1.21695	0.573785	33.9302
Gpatch8				25 / 411		KDM3A	1.17951	0.515372	1.30927	1.00138
Grb2				7 / 411		KDM5B;JARID1B	1.86871	0.456008	1.9087	1.41114
Grb7				1 / 411		KDM6B	0.897692	2.07823	0.652265	1.2094
Hat1				41 / 411		LAMTOR1	1			1
Hca90				44 / 411		LATS1	1			1
Htra2				2 / 411		LDB1	1.58152	1.43014	0.740451	1.2507
Iqgap1				95 / 411		LDHA	0.926304			0.926304
Id1						LDHB	1.03398			1.03398
Itch				2 / 411		LEFTY2;LEFTY1		0.6759	1.19065	0.933276
Jak1				14 / 411		LIMA1	0.927844	1.01	0.811207	0.916349
Jarid2						LIMK2	1.55203			1.55203
Jmjd1c				23 / 411		LIN7C;LIN7A	0.7376			0.7376
Jmjd6						LLGL2	0.959719	1.43765	0.728449	1.04194
Jup				109 / 411		MAD2L1	0.964006			0.964006
Kat7				17 / 411		MAFA	0.903874			0.903874
Kdm1a				37 / 411		MAGED1	1.18554			1.18554
Kdm2b				5 / 411		MAGI1	1.19397	1.17995	1.81362	1.39585
Kdm3a				10 / 411		MAZ	0.902876	0.775011	0.497108	0.724998
Kdm5b				1 / 411		MBD3	1			1
Kdm6b				2 / 411		MCM10	0.99487	0.976006	0.683633	0.884836
Lamptor						MCM2	1.24481	0.664374	0.885945	0.93171
Lats1				2 / 411		MCM3	1.13233	0.893234	1.30102	1.10886
Ldb1						MCM3AP	1			1
LdhA				140 / 411		MCM4	0.899589	0.844107	1.05309	0.932263
Ldhb				164 / 411		MCM5	1.32658	0.822019	1.29973	1.14944
Lefty2;Lefty1						MCM6	1.08498	0.687089	1.02455	0.932209
Lima1				76 / 411		MCM7	1.19346	0.919338	0.949846	1.02088
limk2						MLL3	1.61982	1.87919	0.847767	1.44893
Lin7C				4 / 411		MLLT4	0.896907	0.697158	1.13198	0.908682
Llgl2						MLLT6	1			1
Mad2L1				16 / 411		MSTO1	0.98744			0.98744
Mafa						MTA2;DKFZp686F2281	1.06556			1.06556
Maged1				28 / 411		MTA3	0.749745			0.749745
Magi1				3 / 411		ORC1	100	0.814457	0.698878	33.8378
Maz				8 / 411		ORC4	1.16439			1.16439
Mbd4				7 / 411		OTUB1	0.994112	0.479257	1.06906	0.847477
Mcm10				3 / 411		OTUD4	1.11153	2.12079	0.631168	1.28783
Mcm2				95 / 411		PATL1	0.458823			0.458823
Mcm3				120 / 411		PDCD6	0.960793			0.960793
Mcm3AP				8 / 411		PDCD6IP	0.939765	0.997067	0.736165	0.890999
Mcm4				113 / 411		PDK1	1.03445	5.45563e+06	2.14762	1.81854e+06
Mcm5				100 / 411		PDLIM5	1.13488			1.13488
Mcm6				101 / 411		PDLIM7	0.962395	0.474546	1.29044	0.909126
Mcm7				123 / 411		PDZD11	0.972525			0.972525
Mga				47 / 411		PGAM1;PGAM4	0.440394	0.379773	1.05191	0.624024
Mll2				10 / 411		PGAM5	1.30431	1.22548	1.14831	1.22603
Mll3				1 / 411		PIAS1;PIAS2	1			1
Mllt10				2 / 411		PLEKHA5	1.59738			1.59738
Mllt4				25 / 411		PLEKHA7	0.951564	2.33467	0.487645	1.25796
Mllt6				13 / 411		PLEKHG5	0.47772	1.80876	0.566302	0.950927
Msto						PLK1	1.25542	1.02954	1.33524	1.20673
Mta2				66 / 411		POU3F1	1.13803	1	797751	265918
Mta3				44 / 411		POU5F1;POU5F1B	1.18172	0.527941	1.3717	1.02712
Orc1				4 / 411		PTK2	1.28605			1.28605
Orc4				4 / 411		PXN	0.8			0.8
Otub1				16 / 411		RAB1B;RAB1C	0.501268	1.88877	6.19875e+06	2.06625e+06
Otud4				40 / 411		RAB5C	1.6	0.6889	1.21352	1.16747
Patz1				6 / 411		RAB6B;RAB6C;RAB39A;RAB6A	0.755118			0.755118
Pdcd6				27 / 411		RAB7A	1	0.752373	1.40023	1.05087
Pdcd6ip				55 / 411		RAD23B	0.495962			0.495962
Pdk1				7 / 411		RAD50	1.98927	1	0.477791	1.15569
Pdlim1				32 / 411		RAD51	1.39351			1.39351
Pdlim5				27 / 411		RAD54L2	100			100
Pdlim7				16 / 411		RAF1	1.81329	1.02048	0.586654	1.14014
Pdzd11				8 / 411		RALB;RALA	0.770793	1.25746	0.610299	0.879518
Pgam1				95 / 411		RAN	0.872217	0.730781	0.983135	0.862044
Pgam5				73 / 411		RANBP1	0.913129	0.609984	0.939762	0.820958
Pias1				2 / 411		RAP1B;RAP1A	1.02893	0.60935	0.800071	0.812784
Plekha5				13 / 411		RCC1	0.723107	0.550811	0.524823	0.59958
Plekha7				3 / 411		RCC2	1.04137	1.0288	1.20666	1.09228
Plekhg5				3 / 411		RECQL5	1.64345			1.64345
Plk1				14 / 411		REST	1	0.867548	2.69971	1.52242
Pou3f1						RFX7	1			1
Pou5f1						RGPD1;RGPD2	1.55455			1.55455
Ptk2						RHOA;RHOC	1.1097	0.8855	1.19673	1.06398
Pxn				19 / 411		RICTOR	1			1
Rab1b				69 / 411		RIF1	1.08361	0.667918	0.956605	0.90271
Rab39a;Rab6a;Rab6b						RIOK2	1.49987	1.11571	1.20164	1.27241
Rab5c;Rab5b;Rab5a						RIOK3	3.50923	0.774134	1.59032	1.95789
Rab7a				63 / 411		RIPK1	3.19882			3.19882
Rad23b				23 / 411		RMND5A	1			1
Rabgap1				8 / 411		RNF111	1.2386	1.03214	0.988057	1.08626
Rac1;Rac2;Rac3						RPTOR	0.654064			0.654064
Rad50				43 / 411		RQCD1	1.75967			1.75967
Rad51						RUNX1	1			1
Rad54L2						SAFB	1.87062	0.973278	1.04794	1.29728
Raf1				6 / 411		SAFB2	1.27766	0.893627	1.43435	1.20188
Rala;Ralb						SALL1	1.01582	0.463211	0.246393	0.575143
Ran;1700009N14Rik						SALL4		1.09867	0.625113	0.86189
Ranbp1				90 / 411		SETD1A	0.919279	0.325383	1.30583	0.850163
Ranbp2				90 / 411		SETD2	1.29911	6.41914	1.1668	2.96168
Rangap1				92 / 411		SHC1	1.0944			1.0944
Rap1b;Rap1a						SKP1	1.22374	0.786102	1.72798	1.24594
Rcc1				61 / 411		SMAD2	1.37588	0.82687	1.89331	1.36535
Rcc2				111 / 411		SMAD4	2			2
Recql5				4 / 411		SMURF1	2			2
Rest				6 / 411		STAT1	0.8573			0.8573
Rfx7				1 / 411		STAT3	1			1
Rgpd1				52 / 411		STK3;STK4	1.75426		0.776468	1.26536
Rhoa;Rhoc						STK3;STK4	1.75426			1.75426
Rictor				4 / 411		TAB1	0.316875			0.316875
Rif1				61 / 411		TAB2	2.16348			2.16348
Riok1				99 / 411		TAB3	0.789314			0.789314
Riok2				2 / 411		TAF15	0.716259	1.69284	0.515939	0.975014
Ripk3						TAF2	0.914109	2.56636	0.236358	1.23894
Rmnd5a				1 / 411		TAF4;TAF4B		1.03721	1.63802	1.33761
Rnf111						TAF5	1.51014	1.14028	2.59547	1.74863
Rptor				3 / 411		TAF5L	1			1
Rqcd1				9 / 411		TBK1	1			1
Runx1				4 / 411		TBL1X;TBL1Y	0.703546			0.703546
Safb				77 / 411		TBL1XR1	0.1			0.1
Safb2				75 / 411		TBX3	1			1
Sall1;Sall3						TCF20	0.797205	2.34984	0.470168	1.20574
Sall4				13 / 411		TCF4	0.648214			0.648214
Set				151 / 411		TCF7L1;TCF7L2;TCF7;LEF1	2.55543	0.849454	0.953255	1.45271
Setd2				20 / 411		TEAD1	1.00872	0.887622	0.94547	0.947272
Setdb1				3 / 411		TEAD2	1.12046			1.12046
Shc1				9 / 411		TEAD3;TEAD4	0.608143			0.608143
Skp1;Skp1a						TEAD4	1			1
Smad2;Smad9;Smad3						TJP1	0.703369	1.97965	0.645978	1.10967
Smad4				4 / 411		TJP2	1.14083	1.48058	0.907981	1.17646
Smurf1				1 / 411		TOPBP1	1			1
Stat1				23 / 411		TP53BP2	0.729528			0.729528
Stat3				36 / 411		TP73	1			1
Stk3				8 / 411		VIM	0.740602			0.740602
Tab1				45 / 411		VPRBP	0.628429			0.628429
Tab2				10 / 411		VPS26B	1			1
Tab3				6 / 411		VPS28	0.578793	2.60075e+06	1	866917
Sox15;Sox16						VPS29	0.750173	0.249401	1	0.666525
Sox2						VPS33B	1.38168			1.38168
Taf15				163 / 411		VPS35	0.91155	1	0.905462	0.939004
Taf2				19 / 411		WAPAL	0.672329	0.896034	0.805032	0.791131
Taf3				17 / 411		WBP11	1.44402	0.841138	1.3571	1.21408
Taf4a						WBP4	1.30285	1.03281	1.97766	1.43777
Taf5				20 / 411		WDTC1	1.15016			1.15016
Taf5l				2 / 411		YBX1	0.712276	1.1913	0.410175	0.771252
Taf7				22 / 411		YEATS4	0.1			0.1
Tbk1				10 / 411		YWHAB	0.67619			0.67619
Tbl1x				3 / 411		YWHAE	0.92723	0.466644	0.620639	0.671504
Tbl1xr1				18 / 411		YWHAG	1.19472	0.752077	0.992764	0.979853
Tbx3				1 / 411		YWHAH	0.930688	0.255152	0.664274	0.616705
Tcf20				29 / 411		YWHAQ	0.931208	0.775515	1	0.902241
Tcf4						YWHAZ	0.810973	0.464487	1.21995	0.831803
Tcf7l1;Tcf7l2;Tcf7;Lef1						YY1	0.984215	0.900472	1.03129	0.971994
Tead1				3 / 411		Setdb1		0.175844	1	0.587922
Tead2				2 / 411		Rac1;Rac2;Rac3		0.27616	0.955569	0.615864
Tead3				2 / 411		Rab11fip1		0.194369	1.12092	0.657645
Tead4				2 / 411		Cdc42		0.746883	0.669229	0.708056
Tjp1				35 / 411		Traf4		0.31265	1.14625	0.72945
Tjp2				32 / 411		Cdk2;Cdk3		0.307216	1.2623	0.784757
Topbp11						Baz1b		0.480237	1.09817	0.789203
Tp53bp2				16 / 411		Rab39a;Rab6a;Rab6b		0.730866	0.893958	0.812412
Tp73				4 / 411		Mbd4		0.611746	1.15432	0.883034
Tpx2				44 / 411		Rab1A		0.759129	1.08054	0.919832
Traf4				8 / 411		Rangap1		1.65614	0.215303	0.935724
Vim				257 / 411		Ripk3		0.961816	0.9913	0.976558
Vps13c				1 / 411		Drg1		0.830563	1.14679	0.988674
Vprbp				4 / 411		Cir1		1.18351	0.811292	0.997402
Vps26b				4 / 411		Pml		1	1	1
Vps28				1 / 411		Rab10		1	1	1
Vps29				11 / 411		Rab11fip5		1	1	1
Vps33b				6 / 411		Rab19		1	1	1
Vps35				35 / 411		Vps13c		1	1	1
Wapal				29 / 411		Vps37c		1	1	1
Wbp11				37 / 411		Rab18		1.09199	0.933653	1.01282
Wbp4				5 / 411		Gata6		1.40233	0.672514	1.03742
Wdtc1						Rab11b;Rab11a		1.03938	1.04113	1.04025
Wdr62				15 / 411		Rab1		0.86549	1.21955	1.04252
Whsc1l1				14 / 411		Patz1		1.14123	0.967334	1.05428
Wwtr1				1 / 411		Mllt10		0.879314	1.24567	1.06249
Yap1				15 / 411		Sox15;Sox16		1.20809	0.921812	1.06495
Ybx1				233 / 411		Brd7		0.84473	1.33961	1.09217
Yeats4				2 / 411		Tpx2		1.52075	0.687376	1.10406
Ywhab				146 / 411		Cdk1		0.97205	1.27601	1.12403
Ywhae				186 / 411		Ranbp2		1.40056	0.859663	1.13011
Ywhag				131 / 411		Gpatch4		0.98205	1.28143	1.13174
Ywhah				117 / 411		Rab14		0.731901	1.53726	1.13458
Ywhaq				153 / 411		Taf7		0.74601	1.56092	1.15346
Ywhaz				180 / 411		Brd2		0.940603	1.40726	1.17393
Yy1				11 / 411		Whsc1l1		1	1.36668	1.18334
						Gpatch1		1.40638	1.08623	1.24631
						Sox2		1.55221	0.961437	1.25682
						Aurkc		0.704285	1.8345	1.26939
						Mga		1	1.55511	1.27756
						Cdk9		1.84336	0.819647	1.3315
						Brd3		1.90764	0.870576	1.38911
						Rabgap1		0.820143	2.05016	1.43515
						Taf3		0.803045	2.07786	1.44045
						Wdr62		0.403652	4.15976	2.28171
						Blm		1	4.92357	2.96179
						Pdlim1		0.682126	3.30878e+06	1.65439e+06
						Aven		9.995e+06	9.01307e-08	4.9975e+06
						Mll2		1.40931	14246525	7.12326e+06
